# Supplementary material for: High-resolution maps of carbon dioxide and moisture fluxes over an urban neighborhood
Source: Royal Society of Chemistry journal article supplement (doi:10.1039/d2ea00108j), 2023-01-01
Supplement: d2ea00108j1.pdf [file d2ea00108j1.pdf]

## Electronic Supplementary Information

### High-resolution maps of carbon dioxide and moisture fluxes over an urban neighborhood

Erik Velasco<sup>a\*</sup>, Elvagrís Segovia<sup>b</sup>, Matthias Roth<sup>b</sup>

<sup>a</sup> Molina Center for Energy and the Environment, USA

<sup>b</sup> Department of Geography, National University of Singapore, 117570, Singapore

\*Corresponding author: [evelasco@mce2.org](mailto:evelasco@mce2.org)

**Table 1.** Statistical metrics for CO<sub>2</sub> and H<sub>2</sub>O fluxes obtained by the aerodynamic resistance approach, and the necessary parameters for its application. The average fluxes measured by the eddy covariance flux tower during the duration of each measurement round are also included, as well as the reasons why the approach failed in some cases. Fluxes of measurements that turned out to be suspicious are written in red font.

| Date (period)              | Trial No. | Eddy covariance flux tower                                  |                                                             |                                     |                                     |                         | Aerodynamic resistance approach |                                     |                                                                                         |                                                                                                                                                            |                                                                                         |                                                                                                                                                            | Reasons for errors                                                                      |
|----------------------------|-----------|-------------------------------------------------------------|-------------------------------------------------------------|-------------------------------------|-------------------------------------|-------------------------|---------------------------------|-------------------------------------|-----------------------------------------------------------------------------------------|------------------------------------------------------------------------------------------------------------------------------------------------------------|-----------------------------------------------------------------------------------------|------------------------------------------------------------------------------------------------------------------------------------------------------------|-----------------------------------------------------------------------------------------|
|                            |           | CO <sub>2</sub> flux (Mg km <sup>-2</sup> h <sup>-1</sup> ) | H <sub>2</sub> O flux (mg m <sup>-2</sup> s <sup>-1</sup> ) | Q <sub>H</sub> (W m <sup>-2</sup> ) | Q <sub>E</sub> (W m <sup>-2</sup> ) | T <sub>tower</sub> (°C) | T <sub>0</sub> (°C)             | r <sub>H</sub> (s m <sup>-1</sup> ) | CO <sub>2</sub> flux Mean ± 1 Std. Dev. (median) (Mg km <sup>-2</sup> h <sup>-1</sup> ) | CO <sub>2</sub> flux Max (Min) PCTL (25 <sup>th</sup> -75 <sup>th</sup> ) PCTL (5 <sup>th</sup> -95 <sup>th</sup> ) (Mg km <sup>-2</sup> h <sup>-1</sup> ) | H <sub>2</sub> O flux Mean ± 1 Std. Dev. (median) (mg m <sup>-2</sup> s <sup>-1</sup> ) | H <sub>2</sub> O flux Max (Min) PCTL (25 <sup>th</sup> -75 <sup>th</sup> ) PCTL (5 <sup>th</sup> -95 <sup>th</sup> ) (mg m <sup>-2</sup> s <sup>-1</sup> ) |                                                                                         |
| <b>Morning rush hour</b>   |           |                                                             |                                                             |                                     |                                     |                         |                                 |                                     |                                                                                         |                                                                                                                                                            |                                                                                         |                                                                                                                                                            |                                                                                         |
| 18 Oct 2016 (7:08-8:24)    | 1         | 2.83                                                        | 1.5                                                         | 5.00                                | 1.5                                 | 27.86                   | 28.15                           | 68.08                               | 15.46 ± 3.48 (14.34)                                                                    | 71.03 (11.87)<br>13.70 – 16.32<br>12.62 – 21.14                                                                                                            | ---                                                                                     | ---                                                                                                                                                        | Sampling affected by light rain                                                         |
| 21 Oct 2016 (6:46-8:16)    | 5         | 0.56                                                        | 12.64                                                       | 8.49                                | 31.01                               | 27.4                    | 28.03                           | 87.27                               | 1.76 ± 2.94 (1.25)                                                                      | 23.18 (-2.92)<br>-0.17 – 3.02<br>-1.85 – 7.16                                                                                                              | ---                                                                                     | ---                                                                                                                                                        | Sampling affected by light rain during the last 15 min                                  |
| 26 Oct 2016 (6:52-8:15)    | 8         | 0.48                                                        | 4.35                                                        | 3.77                                | 10.63                               | 25.57                   | 26.24                           | 209.65                              | 1.25 ± 1.22 (0.97)                                                                      | 8.63 (-0.89)<br>0.36 – 1.86<br>-0.12 – 3.55                                                                                                                | 6.12 ± 0.81 (6.02)                                                                      | 8.81 (3.91)<br>5.50 – 6.60<br>4.99 – 7.58                                                                                                                  |                                                                                         |
| 7 Nov 2016 (6:57-8:20)     | 12        | 0.98                                                        | 2.30                                                        | 5.70                                | 5.63                                | 27.05                   | 27.38                           | 29.53                               | 4.89 ± 3.86 (4.44)                                                                      | 23.35 (-3.37)<br>2.24 – 7.14<br>-0.89 – 11.91                                                                                                              | 5.47 ± 1.47 (5.50)                                                                      | 10.08 (0.35)<br>4.58 – 6.52<br>2.85 – 7.76                                                                                                                 | Flux tower: nonstationary conditions for CO <sub>2</sub> during half of sampling period |
| 8 Nov 2016 (6:59-8:15) 313 | 13        | ---                                                         | ---                                                         | 9.06                                |                                     | 25.05                   | 26.24                           | 153.09                              | 1.64 ± 1.71 (1.39)                                                                      | 19.83 (-1.53)<br>0.49 – 2.40<br>-0.49 – 4.68                                                                                                               | 3.27 ± 1.11 (3.16)                                                                      | 7.96 (0.04)<br>2.76 – 3.81<br>1.39 – 5.04                                                                                                                  | Sampling affected by light rain                                                         |
| 23 Nov 2016 (6:47-8:22)    | 18        | 1.03                                                        | 7.26                                                        | 5.62                                | 17.80                               | 25.84                   | 27.15                           | 275.16                              | 1.67 ± 0.83 (1.62)                                                                      | 11.75 (-0.04)<br>1.13 – 2.13<br>0.32 – 3.08                                                                                                                | 5.47 ± 0.95 (5.35)                                                                      | 7.93 (3.32)<br>4.77 – 6.20<br>4.08 – 7.11                                                                                                                  |                                                                                         |

Table S1. Continuation.

| Date<br>(period)             | Trial<br>No. | Eddy covariance flux tower                                     |                                                                |                                        |                                        |                            | Aerodynamic resistance approach |                                        |                                                                                                     |                                                                                                                                                                        |                                                                                                     |                                                                                                                                                                        | Reasons for errors                                                                             |
|------------------------------|--------------|----------------------------------------------------------------|----------------------------------------------------------------|----------------------------------------|----------------------------------------|----------------------------|---------------------------------|----------------------------------------|-----------------------------------------------------------------------------------------------------|------------------------------------------------------------------------------------------------------------------------------------------------------------------------|-----------------------------------------------------------------------------------------------------|------------------------------------------------------------------------------------------------------------------------------------------------------------------------|------------------------------------------------------------------------------------------------|
|                              |              | CO <sub>2</sub> flux<br>(Mg km <sup>-2</sup> h <sup>-1</sup> ) | H <sub>2</sub> O flux<br>(mg m <sup>-2</sup> s <sup>-1</sup> ) | Q <sub>H</sub><br>(W m <sup>-2</sup> ) | Q <sub>E</sub><br>(W m <sup>-2</sup> ) | T <sub>tower</sub><br>(°C) | T <sub>0</sub><br>(°C)          | r <sub>H</sub><br>(s m <sup>-1</sup> ) | CO <sub>2</sub> flux<br>Mean ± 1<br>Std. Dev.<br>(median)<br>(Mg km <sup>-2</sup> h <sup>-1</sup> ) | CO <sub>2</sub> flux<br>Max (Min)<br>PCTL (25 <sup>th</sup> -75 <sup>th</sup> )<br>PCTL (5 <sup>th</sup> -95 <sup>th</sup> )<br>(Mg km <sup>-2</sup> h <sup>-1</sup> ) | H <sub>2</sub> O flux<br>Mean ± 1<br>Std. Dev.<br>(median)<br>(mg m <sup>-2</sup> s <sup>-1</sup> ) | H <sub>2</sub> O flux<br>Max (Min)<br>PCTL (25 <sup>th</sup> -75 <sup>th</sup> )<br>PCTL (5 <sup>th</sup> -95 <sup>th</sup> )<br>(mg m <sup>-2</sup> s <sup>-1</sup> ) |                                                                                                |
| <b>Midday</b>                |              |                                                                |                                                                |                                        |                                        |                            |                                 |                                        |                                                                                                     |                                                                                                                                                                        |                                                                                                     |                                                                                                                                                                        |                                                                                                |
| 18 Oct 2016<br>(11:20-12:36) | 2            | 0.76                                                           | 37.98                                                          | 271.24                                 | 93.12                                  | 30.11                      | 33.06                           | 12.58                                  | 0.56 ± 10.94<br>(-3.24)                                                                             | 97.62 (-17.56)<br>-7.23 - 4.99<br>-8.69 - 21.88                                                                                                                        | ---                                                                                                 | ---                                                                                                                                                                    |                                                                                                |
| 20 Oct 2016<br>(11:20-12:42) | 4            | ---                                                            | 27.43                                                          | 202.61                                 | 67.2                                   | 29.96                      | 36.34                           | 36.39                                  | -0.20 ± 4.84<br>(-1.66)                                                                             | 42.59 (-6.10)<br>-3.77 - 2.11<br>-4.83 - 8.69                                                                                                                          | ---                                                                                                 | ---                                                                                                                                                                    | Flux tower: nonstationary<br>conditions for CO <sub>2</sub>                                    |
| 24 Oct 2016<br>(11:30-12:50) | 6            | 0.82                                                           | 21.37                                                          | 4.11                                   | 52.4                                   | 26.88                      | 31.72                           | 138.30                                 | 0.01 ± 0.18<br>(-0.01)                                                                              | 2.07 (-0.33)<br>-0.10 - 0.10<br>-0.23 - 46.00                                                                                                                          | ---                                                                                                 | ---                                                                                                                                                                    | Very cloudy conditions and<br>some previous rain                                               |
| 26 Oct 2016<br>(11:16-12:42) | 9            | 0.34                                                           | 21.07                                                          | 66.6                                   | 53.3                                   | 28.22                      | 30.14                           | 33.63                                  | 1.42 ± 5.53<br>(0.07)                                                                               | 111.58 (-7.49)<br>-2.23 - 3.91<br>-4.34 - 11.05                                                                                                                        | 51.55 ±<br>18.74<br>(57.77)                                                                         | 87.60 - -4.28<br>38.83 - 66.03<br>9.94 - 73.09                                                                                                                         | Affected by light rain                                                                         |
| 28 Oct 2016<br>(11:31-12:52) | 10           | 0.35                                                           | 32.55                                                          | 175.02                                 | 65.3                                   | 28.68                      | 31.84                           | 21.12                                  | -0.86 ± 8.57<br>(-2.67)                                                                             | 97.89 (-16.32)<br>-7.90 - 3.78<br>-9.79 - 14.73                                                                                                                        | 69.14 ±<br>12.39<br>(67.17)                                                                         | 104.91 (43.20)<br>59.53 - 77.64<br>52.18 - 90.74                                                                                                                       | Flux tower: nonstationary<br>conditions for H <sub>2</sub> O during half of<br>sampling period |
| 22 Nov 2016<br>(11:21-12:47) | 17           | 0.60                                                           | 13.77                                                          | 78.21                                  | 33.73                                  | 27.14                      | 30.87                           | 55.81                                  | -0.74 ± 3.37<br>(-1.18)                                                                             | 34.14 (-6.46)<br>-3.28 - 1.01<br>-4.91 - 5.14                                                                                                                          | 27.63 ± 3.39<br>(27.99)                                                                             | 36.77 (17.16)<br>25.80 - 29.94<br>20.74 - 32.39                                                                                                                        |                                                                                                |
| <b>Evening rush hour</b>     |              |                                                                |                                                                |                                        |                                        |                            |                                 |                                        |                                                                                                     |                                                                                                                                                                        |                                                                                                     |                                                                                                                                                                        |                                                                                                |
| 19 Oct 2016<br>(18:22-19:32) | 3            | 1.36                                                           | ---                                                            | 3.72                                   | ---                                    | 28.75                      | 29.59                           | 260.39                                 | 0.83 ± 0.78<br>(0.59)                                                                               | 6.27 (-0.13)<br>0.32 - 1.06<br>0.09 - 2.45                                                                                                                             | ---                                                                                                 | ---                                                                                                                                                                    | Flux tower: nonstationary<br>conditions for H <sub>2</sub> O                                   |
| 24 Oct 2016<br>(18:20-19:30) | 7            | ---                                                            | ---                                                            | ---                                    | ---                                    | ---                        | ---                             | ---                                    | ---                                                                                                 | ---                                                                                                                                                                    | ---                                                                                                 | ---                                                                                                                                                                    | Rainy conditions                                                                               |
| 31 Oct 2016<br>(18:29-19:47) | 11           | 1.47                                                           | 5.10                                                           | 10.84                                  | 12.50                                  | 27.85                      | 28.72                           | 94.08                                  | 0.46 ± 2.60<br>(0.24)                                                                               | 28.01 (-3.09)<br>-1.28 - 1.75<br>-3.09 - 4.72                                                                                                                          | 5.35 ± 2.32<br>(5.33)                                                                               | 14.18 (-3.21)<br>3.98 - 6.85<br>1.45 - 8.94                                                                                                                            |                                                                                                |
| 10 Nov 2016<br>18:23-19:47   | 14           | 1.20                                                           | 12.92                                                          | 5.23                                   | 31.73                                  | 25.88                      | 27.80                           | 429.65                                 | 1.79 ± 0.62<br>(1.71)                                                                               | 10.42 (0.79)<br>1.35 - 2.11<br>0.96 - 2.85                                                                                                                             | 3.78 ± 0.94<br>(3.74)                                                                               | 6.31 (1.45)<br>1.35 - 3.05<br>2.34 - 5.27                                                                                                                              |                                                                                                |
| 16 Nov 2016<br>(18:21-19:49) | 15           | 0.92                                                           | 6.23                                                           | 6.48                                   | 8.27                                   | 26.36                      | 26.90                           | 97.31                                  | 4.29 ± 2.41<br>(4.07)                                                                               | 26.00 (0.16)<br>2.56 - 5.63<br>1.07 - 8.30                                                                                                                             | 13.22 ± 1.62<br>(13.18)                                                                             | 18.56 (9.64)<br>11.87-14.31<br>10.76-15.94                                                                                                                             | Difference between T <sub>a</sub> and T <sub>0</sub> is<br>< 0.1 K                             |
| 17 Nov 2016<br>(18:20-19:48) | 16           | 0.77                                                           | 6.17                                                           | 5.69                                   | 15.15                                  | 26.07                      | 27.92                           | 379.79                                 | 1.20 ± 0.64<br>(1.09)                                                                               | 9.18 (-0.40)<br>0.77 - 1.51<br>0.39 - 2.35                                                                                                                             | 4.27 ± 0.51<br>(4.27)                                                                               | 5.88 (2.56)<br>3.96 - 4.62<br>3.35 - 5.05                                                                                                                              |                                                                                                |
